# Supplementary material for: Mapping out the landscape of radiation protection in dentistry: A scoping review of cross-sectional studies
Source: Research Square preprint supplement (doi:10.21203/rs.3.rs-8328405/v1), 2025-12-30
Supplement: Supplementary file 1 [file 2f657b4a13df2d9864dcec80.docx]

The full search strategy across the PubMed database

| Search | Search string |
| --- | --- |
| 1 | ((Dentists OR Dental professionals OR Dental practitioners) AND (Radiation protection OR Radiation safety)) AND (Knowledge) Filters: in the last 10 years, English, Humans |
| 2 | ((Dentists OR Dental professionals OR Dental practitioners) AND (Radiation protection OR Radiation safety)) AND (Awareness) Filters: in the last 10 years, English, Humans |
| 3 | ((Dentists OR Dental professionals OR Dental practitioners) AND (Radiation protection OR Radiation safety)) AND (Practice) Filters: in the last 10 years, English, Humans |
| 4 | ((Dentists OR Dental professionals OR Dental practitioners) AND (Radiation protection OR Radiation safety)) AND (Compliance) Filters: in the last 10 years, English, Humans |
| 5 | ((Dentists OR Dental professionals OR Dental practitioners) AND (Radiation protection OR Radiation safety)) AND (Education) Filters: in the last 10 years, English, Humans |
| 6 | ((Dentists OR Dental professionals OR Dental practitioners) AND (Radiation protection OR Radiation safety)) AND (Training) Filters: in the last 10 years, English, Humans |
| 7 | ((Dentists OR Dental professionals OR Dental practitioners) AND (X-ray protection OR X-ray safety)) AND (Knowledge) Filters: in the last 10 years, English, Humans |
| 8 | ((Dentists OR Dental professionals OR Dental practitioners) AND (X-ray protection OR X-ray safety)) AND (Awareness) Filters: in the last 10 years, English, Humans |
| 9 | ((Dentists OR Dental professionals OR Dental practitioners) AND (X-ray protection OR X-ray safety)) AND (Practice) Filters: in the last 10 years, English, Humans |
| 10 | ((Dentists OR Dental professionals OR Dental practitioners) AND (X-ray protection OR X-ray safety)) AND (Compliance) Filters: in the last 10 years, English, Humans |
| 11 | ((Dentists OR Dental professionals OR Dental practitioners) AND (X-ray protection OR X-ray safety)) AND (Education) Filters: in the last 10 years, English, Humans |
| 12 | ((Dentists OR Dental professionals OR Dental practitioners) AND (X-ray protection OR X-ray safety)) AND (Training) Filters: in the last 10 years, English, Humans |
| 13 | ((Dentists OR Dental professionals OR Dental practitioners) AND (Radiological protection OR Radiological safety)) AND (Knowledge) Filters: in the last 10 years, English, Humans |
| 14 | ((Dentists OR Dental professionals OR Dental practitioners) AND (Radiological protection OR Radiological safety)) AND (Awareness) Filters: in the last 10 years, English, Humans |
| 15 | ((Dentists OR Dental professionals OR Dental practitioners) AND (Radiological protection OR Radiological safety)) AND (Practice) Filters: in the last 10 years, English, Humans |
| 16 | ((Dentists OR Dental professionals OR Dental practitioners) AND (Radiological protection OR Radiological safety)) AND (Compliance) Filters: in the last 10 years, English, Humans |
| 17 | ((Dentists OR Dental professionals OR Dental practitioners) AND (Radiological protection OR Radiological safety)) AND (Education) Filters: in the last 10 years, English, Humans |
| 18 | ((Dentists OR Dental professionals OR Dental practitioners) AND (Radiological protection OR Radiological safety)) AND (Training) Filters: in the last 10 years, English, Humans |
